# Supplementary material
Source: Research Square preprint supplement (doi:10.21203/rs.3.rs-8110102/v1)
Supplement: Supplementary file 1 [file 27dae18fbb1ac7078ca00fae.docx]

**Table S2** Identification of homologs of type II and Sec-SRP secretion system genes in *P.brasiliense* BS1113 and other *Pectobacterium* spp.

| **Genes in BS1113*** | **Accesion** | **SX309** |  | **PCC21** | | **BC S7** | |
| --- | --- | --- | --- | --- | --- | --- | --- |
| **no. in BS1113** | **Accesion** | **Homology** | **Accesion** | **Homology** | **Accesion** | **Homology** |
|  | **no.** | **(%)** | **no.** | **(%)** | **no.** | **(%)** |
| **Type II secretion system** | | |  |  |  |  |  |
| *hof*C | WP_015731233.1 | ARA75021.1 | 98 | AFR04974.1 | 98 | AIU89729.1 | 95 |
| gspC | WP_015841050.1 | ARA75662.1 | 99 | AFR04337.1 | 97 | aNA | aNA |
| gspD | WP_010300146.1 | ARA75663.1 | 99 | AFR04336.1 | 98 | AIU89204.1 | 96 |
| gspE | WP_005969987.1 | ARA75664.1 | 99 | AFR04335.1 | 98 | AIU89203.1 | 96 |
| gspF | WP_005969986.1 | ARA75665.1 | 99 | AFR04334.1 | 98 | AIU89202.1 | 95 |
| gspG | WP_014916099.1 | ARA75666.1 | 100 | AFR04333.1 | 99 | AIU90534.1 | 97 |
| gspH | WP_015841045.1 | ARA75667.1 | 98 | AFR04332.1 | 96 | AIU89201.1 | 95 |
| gspI | WP_015841044.1 | ARA75668.1 | 99 | AFR04331.1 | 98 | AIU89200.1 | 97 |
| gspJ | WP_011094627.1 | ARA75669.1 | 98 | AFR04330.1 | 97 | AIU90533.1 | 95 |
| gspK | WP_010302966.1 | ARA75670.1 | 99 | AFR04329.1 | 98 | AIU89199.1 | 96 |
| gspL | WP_010681642.1 | ARA75671.1 | 99 | AFR04328.1 | 98 | AIU89198.1 | 94 |
| gspM | WP_014916093.1 | ARA75672.1 | 99 | AFR04327.1 | 98 | AIU89197.1 | 92 |
| gspN | WP_015841039.1 | ARA75673.1 | 97 | AFR04326.1 | 96 | AIU89196.1 | 93 |
| gspO | WP_010302946.1 | ARA75674.1 | 97 | AFR04325.1 | 96 | aNA | aNA |
| gspS | WP_014916107.1 | ARA75658.1 | 100 | AFR04341.1 | 99 | AIU89207.1 | 95 |
| gspB | WP_014916106.1 | ARA75659.1 | 99 | AFR04340.1 | 97 | AIU89206.1 | 85 |
| **Sec-SRP secretion system** | | |  |  |  |  |  |
| *sec*A | WP_446729987.1 | ARA75015.1 | 99 | AFR04981.1 | 99 | aNA | aNA |
| *sec*B | WP_014913761.1 | ARA78220.1 | 100 | AFR01564.1 | 99 | AIU86872.1 | 98 |
| *sec*D | WP_071822569.1 | ARA77381.1 | 100 | AFR02457.1 | 100 | AIU87657.1 | 98 |
| *sec*E | WP_010285488.1 | ARA78176.1 | 100 | AFR01608.1 | 99 | AIU86912.1 | 99 |
| *sec*F | WP_043901963.1 | ARA77380.1 | 100 | AFR02458.1 | 100 | aNA | aNA |
| *sec*G | WP_014914113.1 | ARA77799.1 | 100 | AFR01998.1 | 100 | AIU87260.1 | 98 |
| *sec*M | WP_446729986.1 | ARA75014.1 | 100 | AFR04982.1 | 100 | AIU89735.1 | 94 |
| *sec*Y | WP_010286083.1 | ARA74820.1 | 100 | AFR05193.1 | 100 | AIU89910.1 | 100 |
| *yaj*C | WP_010282033.1 | ARA77382.1 | 100 | AFR02456.1 | 100 | AIU87656.1 | 100 |
| *yid*C | WP_039281389.1 | ARA78443.1 | 99 | AFR05610.1 | 98 | AIU90380.1 | 98 |
| *fts*Y | WP_446729874.1 | ARA74460.1 | 96 | AFR05514.1 | 95 | AIU90215.1 | 86 |

aNA = not available
