# Supplementary material
Source: Research Square preprint supplement (doi:10.21203/rs.3.rs-8110102/v1)
Supplement: Supplementary file 2 [file 3714cd5f906ad601ed0f1f90.docx]

**Table S1 Project information and sequencing statistics for *Pectobacterium brasiliense* BS1113**

| **Property** | **Term** |
| --- | --- |
| Finishing quality | Complete genome |
| Libraries used | PacBio 20-kb SMRT-bell library |
| Sequencing platforms | Illumina; PacBio RS II |
| Fold coverage | 861.0-fold |
| Assemblers | PacBio Unicycler software v. 4.0.0 |
| Gene calling method | NCBI Prokaryotic Genome Annotation Pipeline; GeneMarkS-2+ |
| Locus Tag | ACU36R |
| Genbank ID | CM128641.1 |
| GenBank Date of Release | September 30, 2025 |
| BIOPROJECT | PRJNA1332297 |
| Source Material Identifier | BS1113 |
| Project relevance | Plant-bacteria interaction, tobacco pathogen |
