# Supplementary material
Source: Research Square preprint supplement (doi:10.21203/rs.3.rs-8110102/v1)
Supplement: Supplementary file 3 [file b1634d7dd80a0e5515c24d04.docx]

**Table S3** Genetic elements of T6SS-encoding gene clusters in pathogenic *Pectobacterium* spp.were summarized and the presence of the key T6SS structure genes is indicated for the analysed genomes.

| **Functional context** | **Key genes Name** | **Description** | **Accesion no. in BS1113** | **Accesion no. in SX309** | **Accesion no. in PCC21** | **Accesion no. in BC S7** |
| --- | --- | --- | --- | --- | --- | --- |
| **Secreted substrate** | *vgr*G | Type VI secretion system secreted protein VgrG | WP_039517996.1 | B5S52_00350  B5S52_05200  B5S52_05550  B5S52_09335  B5S52_10725 | PCC21_032250  PCC21_033020  PCC21_041400 | BCS7_14575  BCS7_16260  BCS7_16635  BCS7_19685  BCS7_20930 |
| *hcp* | Type VI secretion system effector, Hcp1 family | WP_014916572.1 WP_014916345.1 WP_039466971.1 WP_039496946.1 WP_010285305.1  WP_012822145.1 | B5S52_00355  B5S52_04220  B5S52_05420  B5S52_05450  B5S52_05545  B5S52_09330  B5S52_13980  B5S52_14140  B5S52_16680  B5S52_18295  B5S52_18460  B5S52_19450  B5S52_21035 | PCC21_032260  PCC21_041390 | BCS7_04320  BCS7_14585  BCS7_16265  BCS7_16310  BCS7_20925 |
| **Outer membrane protein** | *vas*D | Type VI secretion system protein VasD (Putative lipoprotein) | WP_010282515.1 | B5S52_05495 | PCC21_032360 | BCS7_14495  BCS7_16370 |
| **Inner membrane protein** | *imp*L | Type VI secretion system protein ImpL (IcmF-related protein) | WP_225584378.1 | B5S52_05530 | PCC21_032290 | BCS7_04365  BCS7_14545  BCS7_16335 |
| *imp*K | Type VI secretion system protein ImpK/ DotU | WP_014916353.1 | B5S52_05505 | PCC21_032340 | BCS7_14595 |
| **ATPase** | *clp*V | Type VI secretion ATPase, ClpV1 family | WP_320699795.1 | B5S52_05510 | PCC21_032330 | BCS7_04325  BCS7_14580  BCS7_16355 |
| **Regulatory**  **protein/Other structure protein** | *imp*B | Type VI secretion system protein ImpB | WP_010282535.1 | B5S52_05465 | PCC21_032420 | BCS7_04295  BCS7_14610  BCS7_16400 |
| *imp*C | Type VI secretion system protein ImpC | WP_446730115.1 | B5S52_05470 | PCC21_032410 | BCS7_04300  BCS7_14605 |
| *tss*E | Type VI secretion system protein | WP_005972060.1 | B5S52_05475 | PCC21_032400 | BCS7_16390 |
| *imp*G | Type VI secretion system protein ImpG | WP_014916355.1 WP_014916356.1 | B5S52_05480 | PCC21_032390 | BCS7_14505  BCS7_16385 |
| *imp*H | Type VI secretion system protein ImpH | WP_320699795.1 | B5S52_05485 | PCC21_032380 | BCS7_14500  BCS7_16380 |
| *imp*I | Type VI secretion system protein ImpI | WP_205569382.1 | B5S52_05490 | PCC21_032370 | BCS7_16375 |
| *imp*J | Type VI secretion system protein ImpJ | WP_010282515.1 | B5S52_05500 | PCC21_032350 | BCS7_04305  BCS7_14600  BCS7_16365 |
| *vas*H | Sigma-54 dependent transcriptional regulator | ARA75370.1 | B5S52_05515 | PCC21_032320 | aNA |
| *vas*I | Type VI secretion system protein VasI | WP_014916350.1 | B5S52_05520 | PCC21_032310 | BCS7_13230  BCS7_16345 |
| *vas*J | Type VI secretion system protein VasJ | WP_446730116.1 | B5S52_05525 | PCC21_032300 | BCS7_14540  BCS7_16340 |
| *vas*L | Type VI secretion system protein VasL | WP_205605458.1 | B5S52_05535 | PCC21_032280 | BCS7_14475  BCS7_16330 |
| *tss*I | Type VI secretion protein TssI | WP_446729914.1 | aNA | aNA | aNA |

aNA = not available.
