# Supplementary material
Source: Research Square preprint supplement (doi:10.21203/rs.3.rs-8110102/v1)
Supplement: Supplementary file 4 [file d6a3166e23e60991a41a39ba.doc]

**Table S4 Homolog of two-component system encoding genes in *P. brasiliense* BS1113 and other *Pectobacterium* spp.**

| **Genes in BS1113*** | **Product sequence or definition in BS1113** | **Accesion no. or position in BS1113** | **SX309** | | **PCC21** | | **BC S7** | |
| --- | --- | --- | --- | --- | --- | --- | --- | --- |
| **Accesion** | **Homology** | **Accesion** | **Homology** | **Accesion** | **Homology** |
| **no.** | **(%)** | **no.** | **(%)** | **no.** | **(%)** |
| *pho*R | Two-component system, OmpR family, phosphate regulon sensor histidine kinase PhoR | WP_039275418.1 | ARA77392.1 | 100 | AFR02446.1 | 98 | AIU87646.1 | 98 |
| *pho*B | Two-component system, OmpR family, phosphate regulon response regulator PhoB | WP_005975981.1 | ARA77393.1 | 100 | AFR02445.1 | 100 | AIU87645.1 | 100 |
| *pho*Q | Two-component system, OmpR family, sensor histidine kinase PhoQ | WP_014915245.1 | ARA76629.1 | 100 | AFR03329.1 | 99 | AIU88365.1 | 96 |
| *pho*P | Two-component system, OmpR family, response regulator PhoP | WP_039469188.1 | ARA76628.1 | 100 | AFR03330.1 | 99 | AIU88366.1 | 96 |
| *env*Z | Two-component system, OmpR family, osmolarity sensor histidine kinase EnvZ | WP_039277203.1 | ARA74670.1 | 99 | AFR05292.1 | 98 | AIU90004.1 | 97 |
| *omp*R | Two-component system, OmpR family, phosphate regulon response regulator OmpR | WP_005969424.1 | ARA74669.1 | 100 | AFR05293.1 | 99 | AIU90005.1 | 98 |
| *rst*B | Two-component system, OmpR family, sensor histidine kinase RstB | WP_446729215.1 | ARA76244.1 | 99 | AFR03753.1 | 99 | aNA | aNA |
| *rst*A | Two-component system, OmpR family, response regulator RstA | WP_010276861.1 | ARA76245.1 | 100 | AFR03752.1 | 99 | AIU88691.1 | 98 |
| *cpx*A | Two-component system, OmpR family, sensor histidine kinase CpxA | WP_010281575.1 | ARA74496.1 | 100 | AFR05479.1 | 100 | AIU90172.1 | 98 |
| *cpx*R | Two-component system, OmpR family, response regulator CpxR | WP_010281574.1 | ARA74497.1 | 100 | AFR05478.1 | 100 | AIU90173.1 | 98 |
| *bae*S | Two-component system, OmpR family, sensor histidine kinase BaeS | WP_446730176.1 | ARA75590.1 | 99 | AFR04412.1 | 98 | AIU89271.1 | 94 |
| *bae*R | Two-component system, OmpR family, response regulator BaeR | WP_039498485.1 | ARA75589.1 | 98 | AFR04413.1 | 97 | AIU89272.1 | 96 |
| *qse*C | Two-component system, OmpR family, sensor histidine kinase QseC | WP_446729836.1 | ARA78390.1 | 99 | AFR05658.1 | 98 | AIU90343.1 | 93 |
| *qse*B | Two-component system, OmpR family, response regulator QseB | WP_349896008.1 | ARA78389.1 | 99 | AFR05659.1 | 98 | AIU90344.1 | 96 |
| *kdp*D | Two-component system, OmpR family, sensor histidine kinase KdpD | WP_446729419.1 | ARA77211.1 | 99 | AFR02649.1 | 98 | AIU87806.1 | 96 |
| *kdp*E | Two-component system, OmpR family, KDP operon response regulator KdpE | WP_010309408.1 | ARA77212.1 | 100 | AFR02648.1 | 100 | aNA | aNA |
| *rcs*F | Rcs stress response system protein RcsF | WP_010681579.1 | ARA75273.1 | 100 | AFR04748.1 | 100 | AIU89550.1 | 98 |
| *rcs*C | Two-component system, NarL family, capsular synthesis sensor histidine kinase RcsC | WP_205590978.1 | ARA77299.1 | 99 | AFR02540.1 | 98 | AIU87722.1 | 95 |
| *rcs*D | Two-component system, NarL family, sensor histidine kinase RcsD | WP_039502924.1 | ARA77297.1 | 99 | AFR02542.1 | 98 | AIU87724.1 | 94 |
| *arc*B | Two-component system, OmpR family, aerobic respiration control sensor histidine kinase ArcB | WP_039522240.1 | ARA78084.1 | 99 | AFR01718.1 | 99 | AIU87015.1 | 97 |
| *arc*A | Two-component system, OmpR family, aerobic respiration control protein ArcA | WP_010300511.1 | ARA74929.1 | 100 | AFR05070.1 | 99 | AIU89810.1 | 98 |
| *dcu*S | Two-component system, CitB family, sensor histidine kinase DcuS | ARA74406.1 | ARA74406.1 | 99 | AFR05563.1 | 99 | AIU90265.1 | 99 |
| *dcu*R | Two-component system, CitB family, response regulator DcuR | WP_010281107.1 | ARA74407.1 | 100 | AFR05562.1 | 100 | AIU90264.1 | 99 |
| *nar*X | Two-component system, NarL family, nitrate/nitrite sensor histidine kinase NarX | WP_174435727.1 | ARA76260.1 | 99 | AFR03737.1 | 98 | AIU90500.1 | 96 |
| *nar*L | Two-component system, NarL family, nitrate/nitrite response regulator NarL | WP_010276892.1 | ARA76259.1 | 100 | AFR03738.1 | 100 | AIU88684.1 | 98 |
| *nar*Q | Two-component system, NarL family, nitrate/nitrite sensor histidine kinase NarQ | WP_446730545.1 | ARA76060.1 | 99 | AFR03921.1 | 98 | AIU90500.1 | 29 |
| *nar*P | Two-component system, NarL family, nitrate/nitrite response regulator NarP | WP_446729259.1 | ARA76061.1 | 99 | AFR03920.1 | 98 | AIU88772.1 | 98 |
| *fus*K | Two-component system, NarL family, sensor histidine kinase FusK | AFR02803.1 | ARA77056.1 | 99 | AFR02803.1 | 98 | AIU87910.1 | 97 |
| *fus*R | Two-component system, NarL family, response regulator FusR | AFR02804.1 | ARA78553.1 | 100 | AFR02804.1 | 100 | AIU87911.1 | 100 |
| *gln*L | Two-component system, NtrC family, nitrogen regulation sensor histidine kinase GlnL | WP_010298136.1 | ARA78608.1 | 99 | AFR01418.1 | 98 | AIU90362.1 | 100 |
| *gln*G | Two-component system, NtrC family, nitrogen regulation response regulator GlnG | WP_014913637.1 | ARA78370.1 | 100 | AFR01417.1 | 100 | AIU90361.1 | 99 |
| *glr*K | Two-component system, NtrC family, sensor histidine kinase GlrK | WP_002208627.1 | ARA75511.1 | 99 | AFR04492.1 | 98 | AIU89333.1 | 98 |
| *glr*R | Two-component system, NtrC family, response regulator GlrR | WP_010280116.1 | ARA75513.1 | 100 | AFR04490.1 | 99 | AIU89331.1 | 98 |
| *che*A | Two-component system, chemotaxis family, sensor kinase CheA | WP_446729309.1 | ARA75866.1 | 100 | AFR04120.1 | 98 | AIU88947.1 | 96 |
| *che*Y | Two-component system, chemotaxis family, chemotaxis protein CheY | WP_010279519.1 | ARA75871.1 | 100 | AFR04115.1 | 99 | AIU88942.1 | 99 |
| aNA = not available. | | | | | | | | |
