# Supplementary material
Source: Research Square preprint supplement (doi:10.21203/rs.3.rs-8110102/v1)
Supplement: Supplementary file 5 [file dddee294efee0651e6babd8f.doc]

**Table S5 Homologs of Clustered regularly interspaced short palindromic repeats (CRISPR)-CRISPR-associated protein (Cas) in *P. brasiliense* BS1113 and other *Pectobacterium* spp.**

| **Genes in BS1113*** | **Product sequence or definition in BS1113** | **Accesion no. in BS1113** | **SX309** | | **PCC21** | | **BC S7** |  |
| --- | --- | --- | --- | --- | --- | --- | --- | --- |
| **Accesion** | **Homology** | **Accesion** | **Homology** | **Accesion** | **Homology** |
| **no.** | **(%)** | **no.** | **(%)** | **no.** | **(%)** |
| *csy*4 | Type I-F CRISPR-associated endoribonuclease Csy4 | WP_446730013.1 | ARA75082.1 | 99 | AFR04907.1 | 98 | aNA | aNA |
| *csy*3 | Type I-F CRISPR-associated protein Csy3 | WP_446730014.1 | ARA75083.1 | 100 | AFR04906.1 | 99 | aNA | aNA |
| *csy*2 | Type I-F CRISPR-associated protein Csy2 | WP_349842501.1 | ARA75130.1 | 99 | AFR04905.1 | 98 | aNA | aNA |
| *csy*1 | Type I-F CRISPR-associated protein Csy1 | WP_446730015.1 | ARA75131.1 | 97 | AFR04904.1 | 96 | aNA | aNA |
| *cas*3 | Type I-F CRISPR-associated helicase Cas3 | WP_446730016.1 | ARA75132.1 | 99 | AFR04903.1 | 98 | aNA | aNA |
| *cas*1 | Subtype I-F CRISPR-associated endonuclease Cas1 | WP_446730017.1 | ARA75133.1 | 99 | AFR04902.1 | 98 | aNA | aNA |
| aNA = not available. | |  |  |  |  |  |  |  |
